# Supplementary material
Source: publisher site journal article supplement (https://www.dovepress.com/get_supplementary_file.php?f=135785.xlsx)
Supplement: Supplementary file 1 [file get_supplementary_file.php]

## Sheet: Sheet1
year	Trial Name	Mean Age	% Diabetes	%woman	%MI	Follow up duration (weeks)	Blinding	Treatment	beginning Dose	Actual Dose	Dosing Regiment	withdrew	Number randomized	major cerebrovascular	all-cause death	fatal-cardiovascular	fatal-stroke	non-fatal stroke	TIA
2015	ALPS-AMI	65.7±11.7	NR	19	NR	104		pravastatin	10		Titratin	8	261	10	14	3	5	5	NR
		66.3±11.4	NR	19.6	NR	104		atorvastatin	10			7	264	5	9	3	4	1	NR
2013	PEARL	62.9±111.7	NR	19.1	NR	142		piavastatin	2		fixed	3	289	8	27	24	NR	NR	NR
		62.2±12.0	NR	17.8	NR	142		control	0			0	288	9	37	22	NR	NR	NR
2011	SATURN	57.4±8.6	NR	27.1	NR	104		Rosuvastatin	40		fixed	145	520	3	NR	2	NA	3	NA
		57.9±8.5	NR	25.6	NR	104		Atorvastatin	80		fixed	142	519	2	NR	2	NA	2	NA
2011	Alina Kerimkulova	52.8±4.	13.6	45.5	18.2	54		lovastatin	20	20-60	titratin	0	44	NR	NR	NR	NR	NR	NR
		53.1±7.3	12.8	43.6	10.3	54		diet and physical training				0	39	NR	NR	NR	NR	NR	NR
2012	LUNAR	52.9±9.4	NR	11.2	10.4	12	Y	atorvastatin	80	80	fixed	25	278	NR	1	NR	NR	NR	NR
		53.0±9.0	NR	15.3	10.8	12		20rosuvastatin	20	20	fixed	10	277	NR	0	NR	NR	NR	NR
		52.8±8.8		15.9	14.4	12		40rosuvastatin	40	40	fixed	16	270	NR	2	NR	NR	NR	NR
1994	4S	58.6	4	19	79	280	Double-blind	Simvastatin	Started at 20mg/d	28.2	Tritration	126	2221	124	182	111	14	95	19
		58.6	5	18	79	280		Placebo				129	2223	102	256	189	12	61	29
1994	MAAS	54.9	0	12	54	208	Double-blind	Simvastatin	20	28.2	Fixed	NR	193	NR	4	4	NR	NR	NR
		55.6	0	11	55			Placebo				NR	188	NR	11	4	NR	NR	NR
1998	LIPID	62	9	17	64	317	Double-blind	Pravastatin	40	20	Fixed		4512	169	498	331	NR	NR	NR
		62	9	17	64			Placebo					4502	204	633	433	NR	NR	NR
2000	GISSP-P	59.7	12.9	13.3	16.9	156	Open-label	Pravastatin	20	20	Fixed		2138	20	72	40	4	16	NR
		60	14.4	14.2	15.7			Placebo					2133	19	88	56	4	15	NR
2002	GREACE	58	20	22	82	156	Open-label	Atorvastatin	Started at 20mg/d	24	Tritration	NR	800	9	23	20	NR	9	NR
		59	19	21	80			Usual care				NR	800	17	40	38	NR	17	NR
1997	PREDICT	58.5	8.6	17	37.6	24	Double-blind	Pravastain	40	40	Fixed	NR	347	1	4	1	1	NR	NR
		58.2	5.8	15.6	36.6			Placebo				NR	348	0	1	0	0	NR	NR
1993	MARS	58	NR	9	60	114	Double-blind	Lovastatin	Started at 40mg/d	73	Tritration		123	NR	2	NR	NR	NR	NR
		58	NR	9	60			Placebo					124	NR	1	NR	NR	NR	NR
1995	PLAC-II	63	NR	15	54	156	Double-blind	Pravastatin	Started at 20mg/d	34	Tritration	8	75	NR	3	NR	NR	NR	NR
		63	NR	15	54			Placebo				21	76	NR	5	NR	NR	NR	NR
2004	PROVE IT-TIMI	58.1	17.8	22.2	17.8	96	Double-blind	Atorvastatin	80	80	Tritration		2099	21	46	23	NR	21	NR
		58.3	17.5	21.6	19.1			Pravastatin	Started at 40mg/d	40			2063	21	66	29	NR	21	NR
2007	SAGE	72.4	22.4	31.2	45.5	52	Double-blind	Atorvastatin	80	80	Fixed	48	446	NR	6	2	NR	NR	NR
		72.6	24	29.9	46.3			Pravastatin	40	40		46	445	NR	18	6	NR	NR	NR
2008	GISSI-HF	68	27.4	23.8	31.8	216	Double-blind	Rosuvastatin	10	10	Fixed		2285	82	657	478	38	44	NR
		68	25	21.4	33.8			Placebo					2289	66	644	488	29	37	NR
1995	REGRESS	56.5	0.2	0	50	104	Double-blind	Pravastatin	40	40	Fixed		450	NR	5	3	0	NR	NR
		55.9	0	0	45			Placebo					434	NR	7	5	0	NR	NR
2010	FACS	60.9	17.9	29.5	5.1	52	Open-label	Fluvastatin	80	80	Fixed		78	1	1	NR	NR	1	NR
		63.2	20.5	34.6	10.3			Placebo					78	3	4	NR	NR	3	NR
1995	PLAC-I	57	NR	62	46	144	Double-blind	Pravastatin	40	40	Fixed	19	206	0	4	3	0	0	NR
		57	NR	62	41			Placebo				33	202	2	6	3	0	2	NR
1996	CARE	59	15	14	100	260	Double-blind	Pravastatin	40	40	Fixed		2081	54	NR	96	NR	54	NR
		59	14	14	100			Placebo					2078	78	NR	119	NR	78	NR
2001	MIRACL	65	22.2	35.5	24.8	16	Double-blind	Atorvastatin	80	80	Tritration	？	1538	12	64	NR	3	9	NR
		65	24.1	34.1	25.3			Placebo				？	1548	24	68	NR	2	22	NR
2000	SCAT	61	31	13	69	190	Double-blind	Simvastatin	Started at 10mg/d	40	Tritration		230	4	13	7	NR	4	NR
		61	10	9	72			Placebo					230	2	6	4	NR	2	NR
2004	PACT	NR	14.3	23.5	13.8	4	Double-blind	Pravastatin	Started at 20mg/d	33	Tritration		1710	NR	24	13	NR	NR	NR
		NR	13.8	24.3	22.6			Placebo					1698	NR	37	15	NR	NR	NR
1994	CCAIT	53	15	18	58	104	Double-blind	Lovastatin	Started at 20mg/d	36	Tritration	4	165	0	2	2	0	NR	NR
		53	13	19	51			Placebo				9	166	0	2	1	0	NR	NR
1994	LRTS	62	12	28	24	24	Double-blind	Lovastatin	80	80	Fixed		203	0	3	NR	NR	0	NR
		62	11	29	26			Placebo					201	1	1	NR	NR	1	NR
2002	FLORIDA	61	NR	19	12	52	Double-blind	Fluvastatin	80	80	Fixed		265	2	7	4	2		NR
		60	NR	15	11			Placebo					275	1	11	10	1		NR
2003	TREAT TO TARGET	63	NR	24.3	100	52	Double-blind	Atorvastatin	20	20	Tritration	20	556	0	0	0	0	NR	NR
		62.5	NR	24.8	100			Simvastatin	20	20		14	537	0	0	0	0	NR	NR
2002	LIPS	60	14.2	15.8	44	208	Double-blind	Fluvastatin	80	80	Fixed	174/822	844	2	36	13	2	NR	NR
		60	9.8	16.6	44.8			Placebo				196/818	833	1	49	24	1	NR	NR
2002	PROSPER-Secondary	75.3	11	51.7	13.7	208	Double-blind	Pravastatin	40	40	Fixed	5	2891	135	298	94	22	116	77
		75.4	10.5	51.7	13			Placebo				7	2913	131	306	122	14	119	102
2009	SPACE ROCKET	62.1	12.2	20.7	11.8	12	Open-label	Rosuvastatin	40	40	Fixed		633	2	11	NR	NR	2	1
		62.5	12.1	20.5	14			Simvastatin	40	40			630	0	16	NR	NR	0	2
2007	CORONA	73	29	24	60	144	Double-blind	Rosuvastatin	10	10	Fixed		2514	103	728	581	14	89	NR
		73	30	24	60			Placebo					2497	115	759	593	11	104	NR
2010	CENTAURUS	NR	NR	NR	NR	12	Double-blind	Rosuvastatin	20	20	Fixed		406	3	2	2	0	3
		NR	NR	NR	NR			Atorvastatin	80	80			423	0	4	1	NR	0
2006	SPARCL	63	16.7	39.7	NR	312	Double-blind	Atorvastatin	80	80	Fixed	415	2365	165	216	78	24	247	153
		62.5	16.9	41	NR			Placebo				342	2366	311	211	98	41	280	208
2004	Bae et al.2004	60	31	37	13	24	Not reported	Atorvastatin	10	10	Fixed	0	105	1	0	0	0	1	NA
		60	28	27	11			Usual care				0	100	1	0	0	0	1	NA
2004	ALLIANCE	61.1	23.2	17.8	60.1	312	Open-label	Atorvastatin	Started at 10mg/d	40.5	Tritration	?	1217	35	121	43	35	NR	NR
		61.3	21.1	17.7	55.5			Usual care				?	1225	39	127	61	39	NR	NR
2005	PCABG	59.6	57	19.7	92	260	Open-label	Pravastatin	Started at 10mg/d	9.1	Tritration		152	1	6	4	0	1	0
		58.2	44	11.9	96			Placebo					151	6	11	4	1	5	1
2004	PCS	59.2	15	91	NR	260	Not reported	Pravastatin	10	10	Fixed	?	54	3	5	2	0	3	NR
		59.9	20	92	NR			Diet				?	66	4	3	1	0	4	NR
2004	REVERSAL	NR	NR	NR	NR	72	Double-blind	Atorvastatin	80	80	Fixed	41	327	1	1			1
		NR	NR	NR	NR			Pravastatin	40	40		44	327	1	1			1
2005	IDEAL	61.6	12.1	19.2	100	260	Open-label	Atorvastatin	80	80	Tritration	621	4439	NR	366	175	NR	NR	NR
		61.8	12	19.1	100			Simvastatin	Started at 20mg/d	25		311	4449	NR	374	178	NR	NR	NR
2005	Stone et al.2005	NR	17	14	42	52	Double-blind	Atorvastatin	80	80	Tritration	NR	96	1	1	NR	NR	1	NR
		NR	16	12	36			Placebo				NR	103	0	0	NR	NR	0	NR
2005	ATHEROMA	NR	NR	NR	NR	156	Not reported	Pravastatin	Started at 10mg/d	20	Tritration	4	186	5	1	NR	NR	5
		NR	NR	NR	NR			Diet				8	187	4	2	NR	NR	4
2008	OACIS-LIPID	63.6	29.8	26.7	9.1	36	Open-label	Pravastatin	10	2010	Fixed		176	0	3	NR	NR	0	NR
		62.9	33.5	19.8	10.9			Usual care					177	2	2	NR	NR	2	NR
2006	ASPEN-Secondary	60.5	100	38	0	208	Double-blind	Atorvastatin	10	10	Fixed		252	7	26	14	NR	NR	NR
		60.4	100	37	0			Placebo					253	9	27	18	NR	NR	NR
